# Supplementary material for: The Non-Cancer Specific Elevation of the Serum Squamous Cell Carcinoma Antigen during the Post-Radiotherapy Follow-Up of Cervical Cancer Patients
Source: MDPI journal article supplement (doi:10.3390/diagnostics11091585), 2021-08-31
Supplement: s1 [file s1]

**Figure S1**

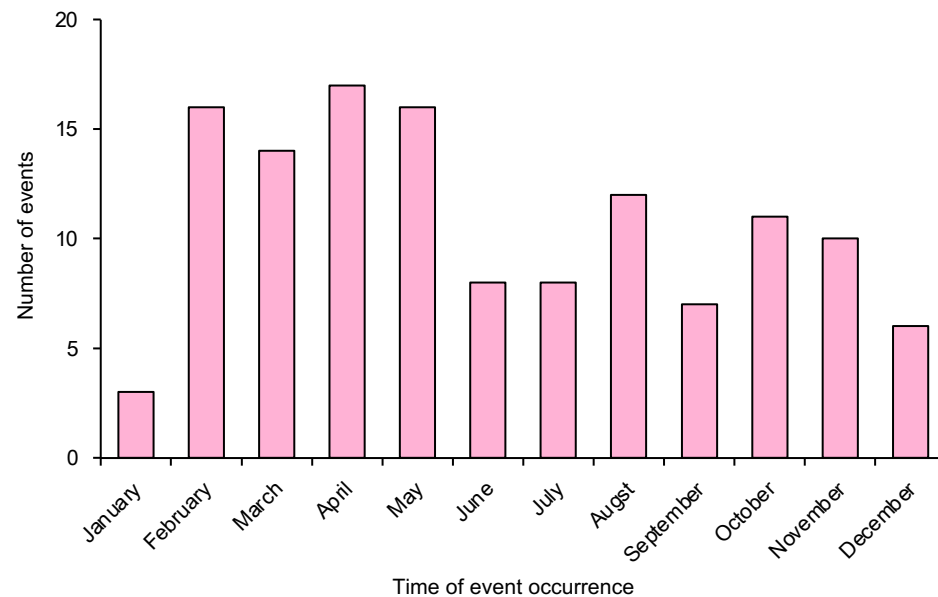

**Figure S1.** Seasonal time of occurrence of post-treatment non-cancer specific elevation of serum squamous cell carcinoma antigen in patients with cervical cancer patients treated with definitive radiotherapy ( $n = 128$ ).

**Figure S2**

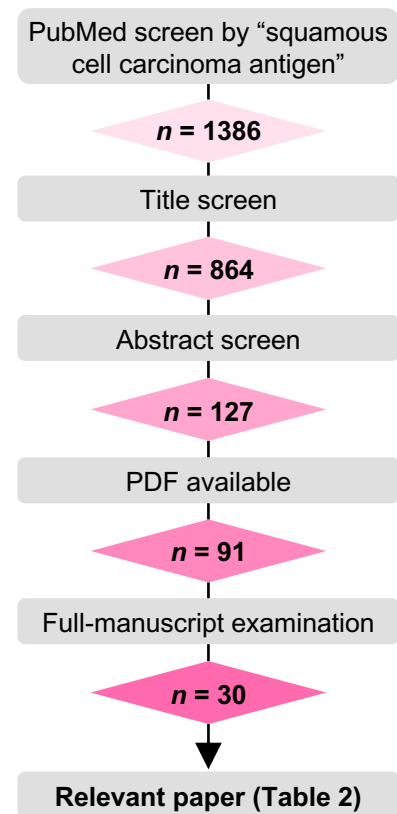

**Figure S2.** Flow diagram showing the systemic literature review of clinical factors potentially associated with non-cancer specific elevation of serum squamous cell carcinoma antigen levels.
